CORRECTION

# Correction: Management of the soybean cyst nematode *Heterodera glycines* with combinations of different rhizobacterial strains on soybean

Yuanyuan Zhou, Yuanyuan Wang, Xiaofeng Zhu, Rui Liu, Peng Xiang, Jingsheng Chen, Xiaoyu Liu, Yuxi Duan, Lijie Chen

[Fig 1](#) is a duplicate of Fig 2. Please see the correct [Fig 1](#) here.

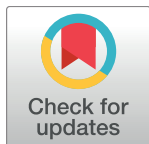

## OPEN ACCESS

**Citation:** Zhou Y, Wang Y, Zhu X, Liu R, Xiang P, Chen J, et al. (2018) Correction: Management of the soybean cyst nematode *Heterodera glycines* with combinations of different rhizobacterial strains on soybean. PLoS ONE 13(3): e0194287. <https://doi.org/10.1371/journal.pone.0194287>

**Published:** March 8, 2018

**Copyright:** © 2018 Zhou et al. This is an open access article distributed under the terms of the [Creative Commons Attribution License](#), which permits unrestricted use, distribution, and reproduction in any medium, provided the original author and source are credited.

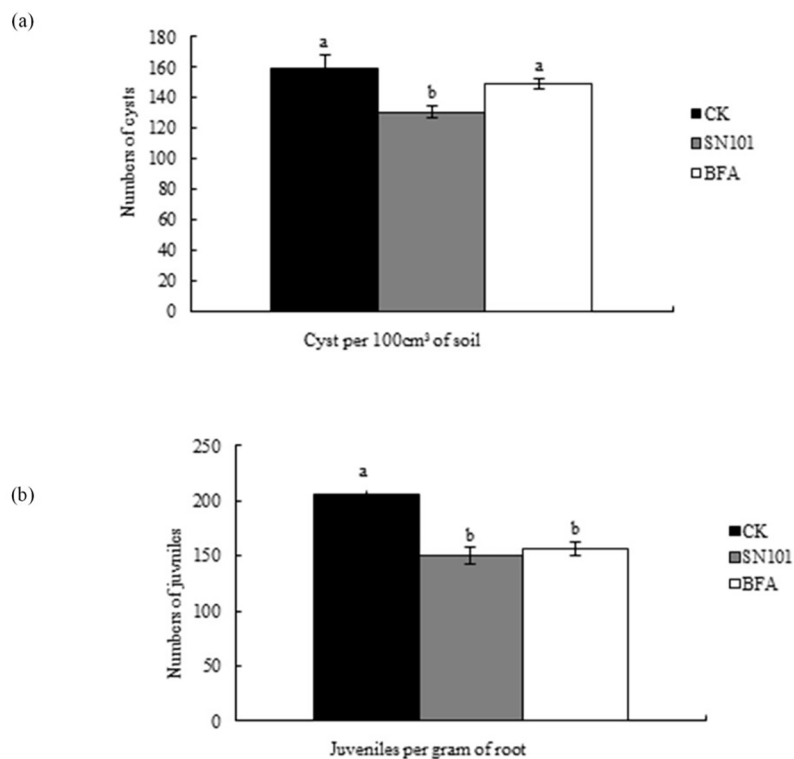

**Fig 1. Effects of SN101 seed coating on the control of SCN infestation in soybean under greenhouse condition.** Plants were treated with biocontrol seed coating-SN101, chemical seed coating-BFA and uncoated-CK. The number of juveniles and cysts was measured after nematode inoculation 30 days. The data in the figure are mean  $\pm$  SE and means on the same column followed by different letters indicate significant differences based on a LSD test ( $P \leq 0.05$ ,  $n = 12$ ).

<https://doi.org/10.1371/journal.pone.0194287.g001>

## Reference

1. Zhou Y, Wang Y, Zhu X, Liu R, Xiang P, Chen J, et al. (2017) Management of the soybean cyst nematode *Heterodera glycines* with combinations of different rhizobacterial strains on soybean. PLoS ONE 12(8): e0182654. <https://doi.org/10.1371/journal.pone.0182654> PMID: 28771591
